# Supplementary material for: IFI27 Integrates Succinate and Fatty Acid Oxidation to Promote Adipocyte Thermogenic Adaption
Source: PubMed Central journal article supplement (PMC10558685; doi:10.1002/advs.202301855), 2023-08-06
Supplement: ADVS-10-2301855-s001.pdf [file ADVS-10-2301855-s001.pdf]

## Supporting Information

for *Adv. Sci.*, DOI 10.1002/adv.202301855

IFI27 Integrates Succinate and Fatty Acid Oxidation to Promote Adipocyte Thermogenic Adaption

*Xuan Cui, Haojie Liu, Ting Shi, Qingwen Zhao, Feiyan Li, Wenjing Lv, Chao Yu, Haiyan Huang, Qi-Qun Tang and Dongning Pan\**

## **Supporting Information**

### **IFI27 integrates succinate and fatty acid oxidation to promote adipocyte thermogenic adaption**

*Xuan Cui, Haojie Liu, Ting Shi, Qingwen Zhao, Feiyan Li, Wenjing Lv, Chao*

*Yu, Haiyan Huang, Qi-Qun Tang, Dongning Pan\**

The file includes:

Supplementary Figures and Figure Legends

Supplementary Tables

Fig. S1

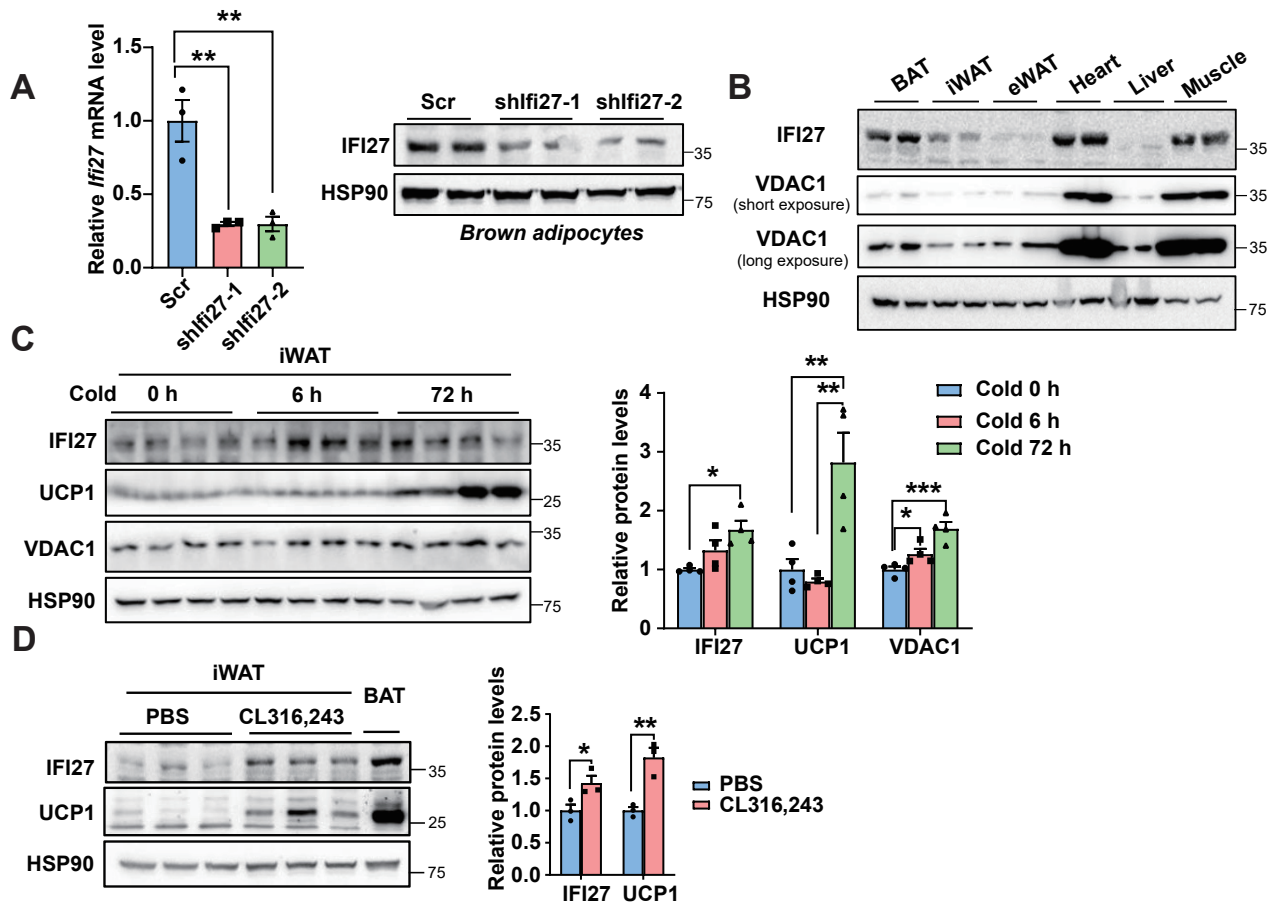

**Figure S1. IFI27 is enriched in BAT and induced by  $\beta$ 3-adrenergic signaling.**

**A.** Lentivirus expressing sh*Ifi27* was used to transduce brown preadipocytes followed by induction to mature adipocytes. QPCR (n=3) and western blot analyzed the *Ifi27* level in the knockdown adipocytes.

**B.** Western blot analysis of the IFI27 and VDAC1 protein in mouse tissues. n=2, 8-week-old male mice.

**C.** IFI27, UCP1 and VDAC1 levels in iWAT after cold challenge for indicated time. Right: quantification of the protein levels. n=4 each group.

**D.** IFI27 and UCP1 protein levels in iWAT of 10-week-old male mice. BAT was used as a positive control. The mice were intraperitoneally injected CL316,243 (0.5 mg kg<sup>-1</sup> body weight) or phosphate-buffered saline (PBS) for 5 days. Right: quantification of IFI27 and UCP1 levels. n=3 each group.

For statistical analyses, one-way ANOVA analysis of variance and Tukey's post hoc tests were performed in (A, C), two-tailed unpaired Student's t test was performed in (D). The data shown are mean  $\pm$  SEM. \*p < 0.05; \*\*p < 0.01; \*\*\*p < 0.001.

Fig. S2

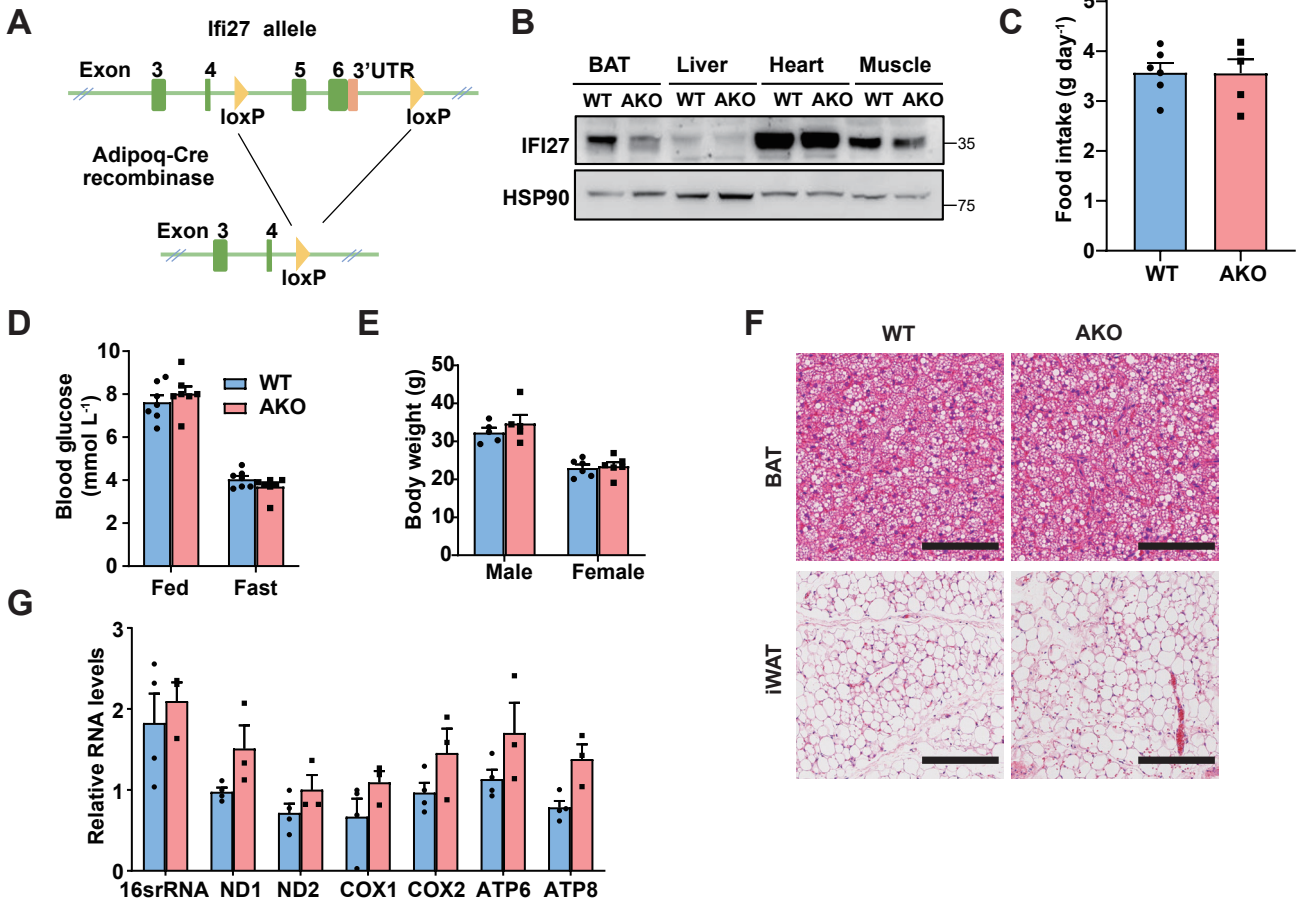

**Figure S2. Adipocyte-specific *Ifi27* knockout mice show relatively normal metabolic phenotype at room temperature.**

**A.** Genetic inactivation of *Ifi27* in adipocytes was achieved by breeding the *Ifi27<sup>flox/flox</sup>* mice to animals expressing *Adipoq-Cre* recombinase. Littermates without *Cre* expression (*Ifi27<sup>flox/flox</sup>*) were used as controls.

**B.** Western blot revealed the IFI27 level in tissues of WT and AKO mice.

**C,D.** Food intake (C) and blood glucose level (D) in 8-week-old male WT and AKO mice. n=5-7 each genotype.

**E.** Body weight of 24-week-old male and female WT and AKO mice housed at room temperature. n=5-6 each genotype.

**F.** Haematoxylin and eosin staining of BAT and iWAT from 11-week-old male mice. Scale bar: BAT 100  $\mu$ m; iWAT 200  $\mu$ m.

**G.** Relative mRNA levels of mitochondrial DNA-encoding genes in BAT. n=3-4 each genotype.

For statistical analyses, two-tailed unpaired Student's t test was performed. The data shown are mean  $\pm$  SEM.

Fig. S3

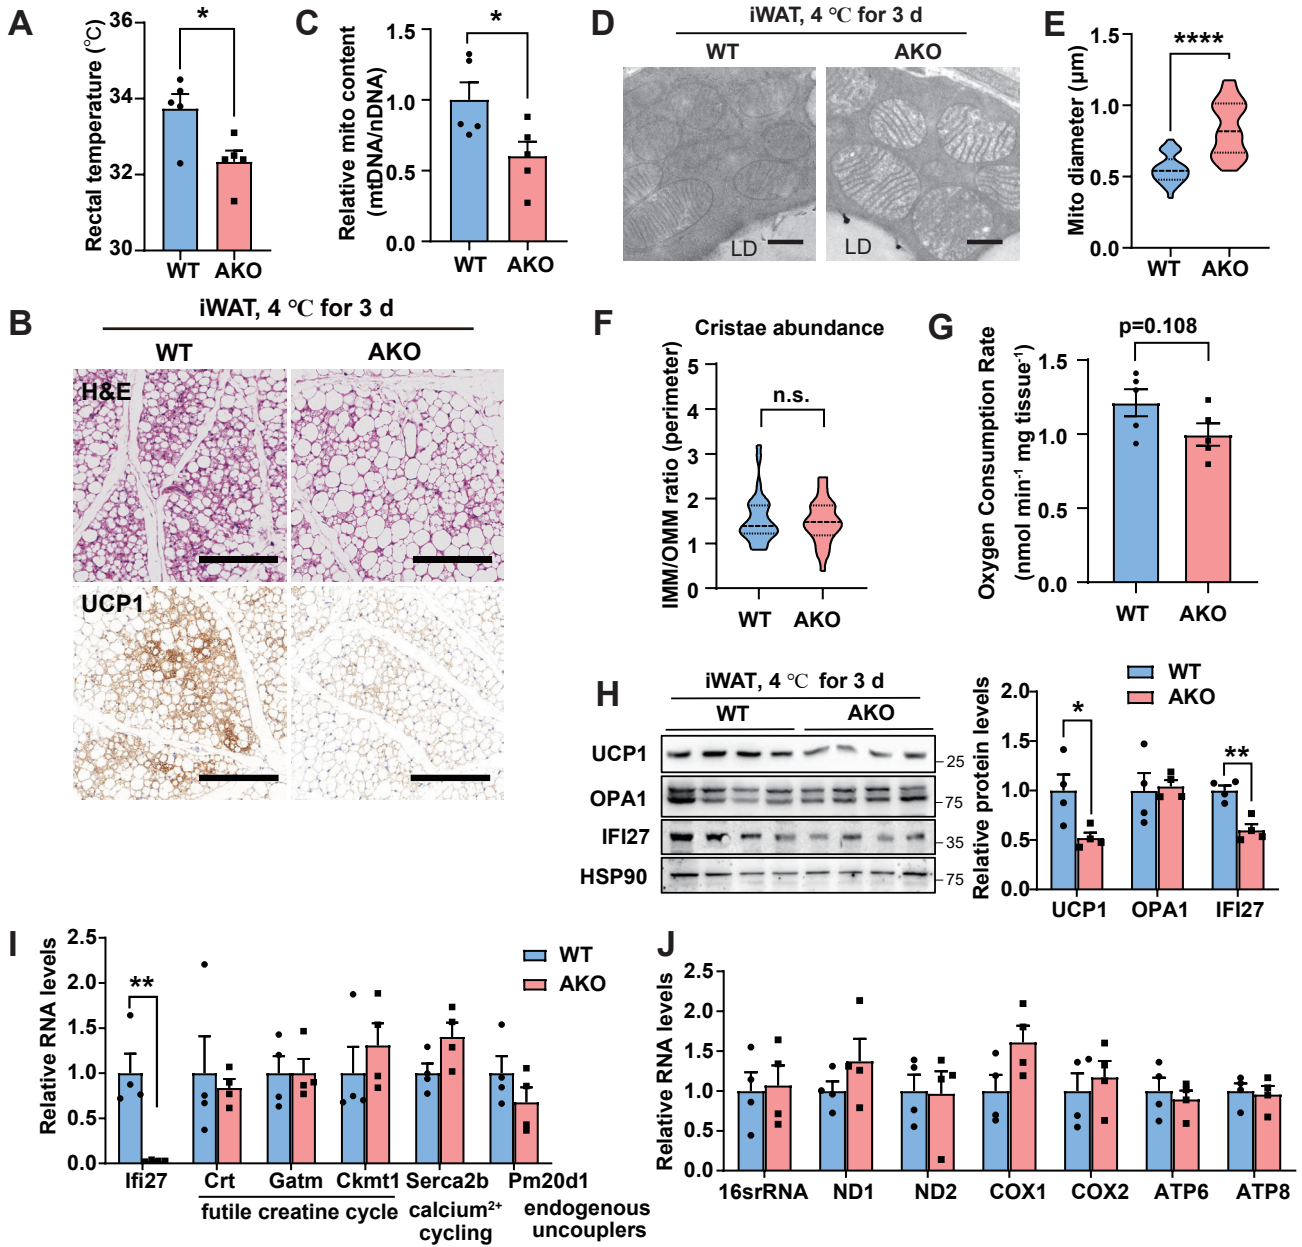

**Figure S3. WAT beiging in *Ifi27*-AKO mice is impaired.**

**A.** Rectal temperature of 8-week-old male WT and AKO mice at 4°C for 3 days. n=5 each genotype.

**B.** Haematoxylin and eosin staining and UCP1 immunostaining of iWAT from WT and AKO mice following 3 days cold exposure. Scale bar: 200 µm.

**C.** Mitochondrial content in iWAT of mice in (A). n=5 each genotype.

**D-F.** Representative EM images showed the mitochondrial morphology in iWAT (D). Mitochondrial diameter (E, n=30) and cristae abundance (F, n=30) were quantified by Image J. The mice were exposed to 4°C for 3 days. LD: lipid droplet. Scale bar: 500 nm. n.s.: not significant.

**G.** Mice were treated as in (A). iWAT oxygen consumption rate was measured by Clark-type oxygen electrodes. n=4 each genotype.

**H.** Mice were treated as in (A). Western blot analysis detected levels of the indicated proteins in iWAT. The right panel showed the protein quantification. n=4 each genotype.

**I.** Quantitative RT-PCR screening of genes involved in Ucp1-independent thermogenic program in iWAT of WT and AKO mice following 3 days cold exposure. n=4 each genotype.

**J.** Relative mRNA levels of genes encoded by mtDNA in iWAT of WT and AKO mice following 3 days cold exposure. n=4 each genotype.

For statistical analyses, two-tailed unpaired Student's t test was performed. The data shown are mean ± SEM. \*p < 0.05; \*\*p < 0.01; \*\*\*\*p < 0.0001.

Fig. S4

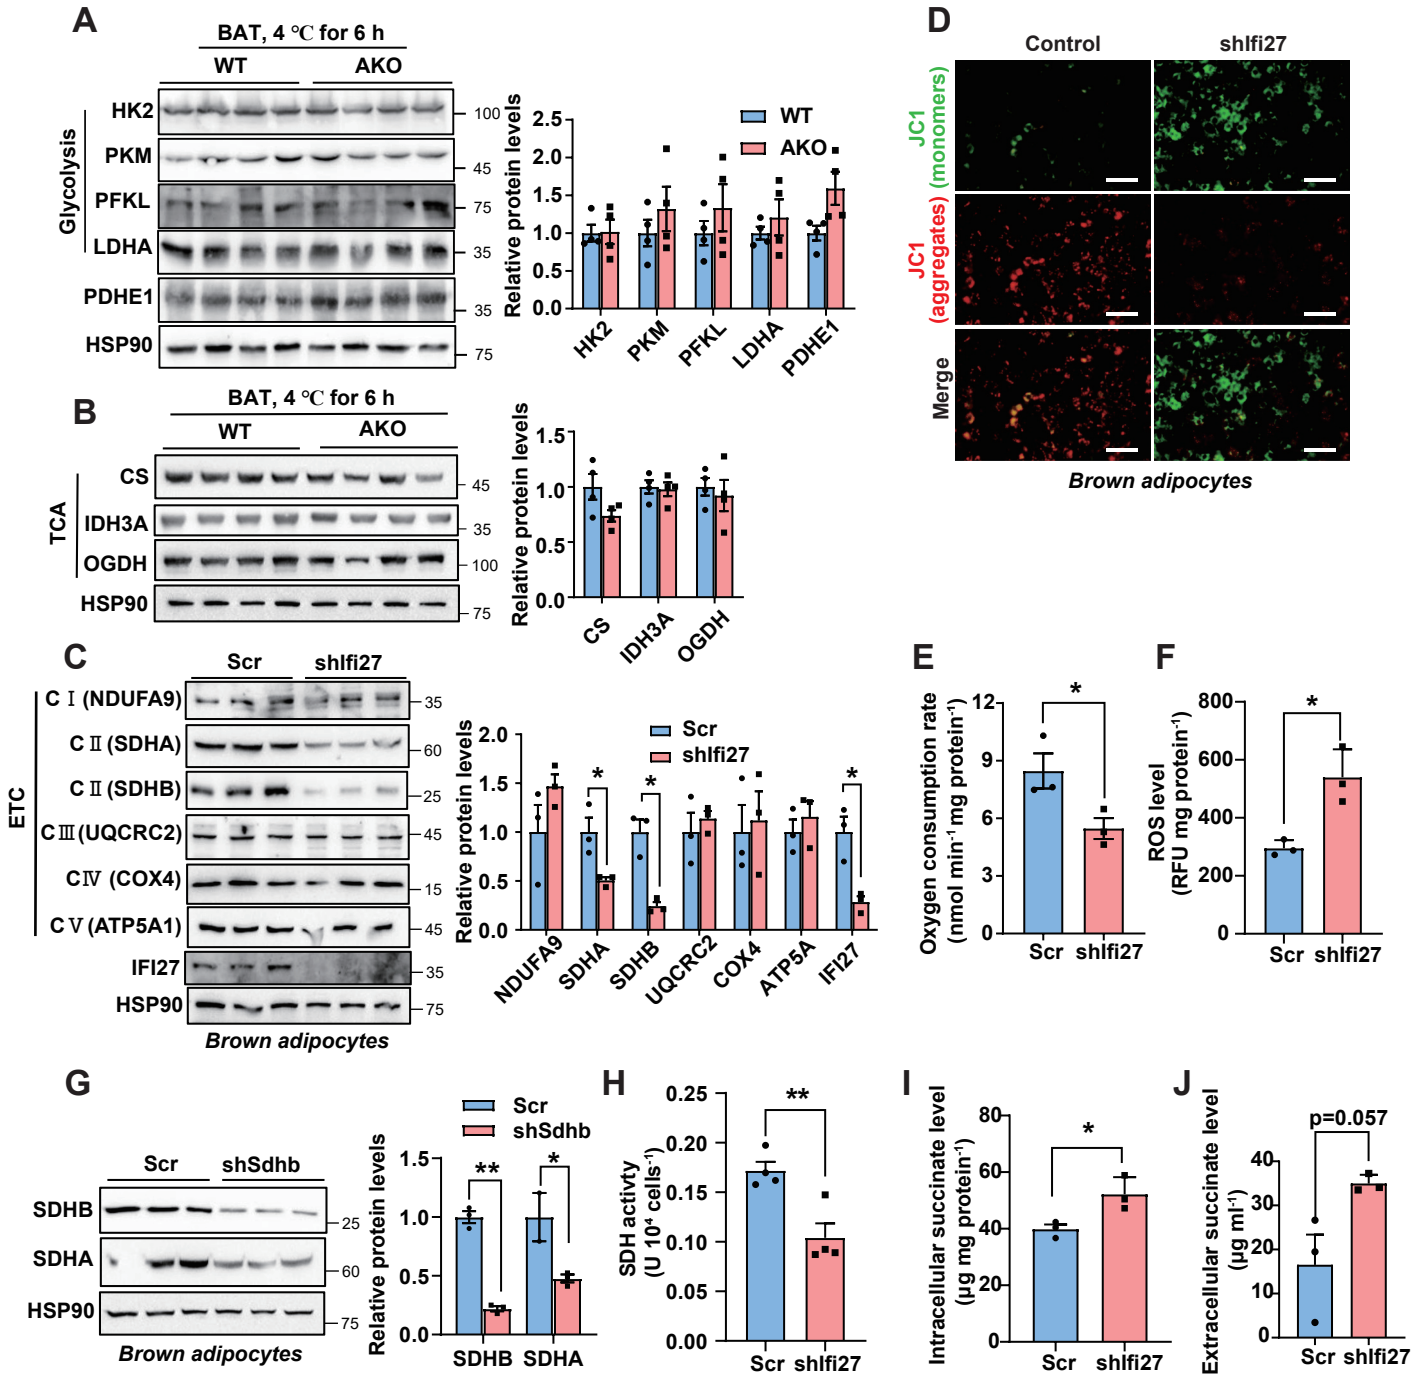



**Figure S4. Knockdown of *Ifi27* decreases the SDHB level *in vitro*.**

**A,B.** Western blot analysis of indicated proteins and their quantification in BAT of mice after 6 h cold exposure. n=4 each genotype.

**C.** Western blot analysis of the representative ETC subunits in brown adipocytes (left). Immortalized brown preadipocytes were knocked down *Ifi27* expression by lentiviral shRNAs. Then cells were induced to mature adipocytes following by western blot analysis on day 6. The right panel showed the protein quantification. n=3 each group.

**D.** The mitochondrial membrane potential analysis by JC1 staining in *Ifi27*-knockdown brown adipocytes. The knockdown cells were generated as in (C).

**E,F.** Oxygen consumption rate (E) and ROS level (F) in *Ifi27*-knockdown adipocytes. n=3 each group.

**G.** Lentiviral shRNAs against *Sdhb* infected preadipocytes. SDHA and SDHB levels were detected (left) and quantified (right) in mature adipocytes on differentiation day 6. n=3 each group.

**H-J.** SDH activity (H), intracellular (I) and extracellular succinate levels (J) were measured in *Ifi27*-knockdown brown adipocytes. n=3-4 each genotype.

For statistical analyses, unpaired two-tailed Student's t tests were performed. The data shown are mean  $\pm$  SEM. \*p < 0.05; \*\*p < 0.01.

Fig. S5

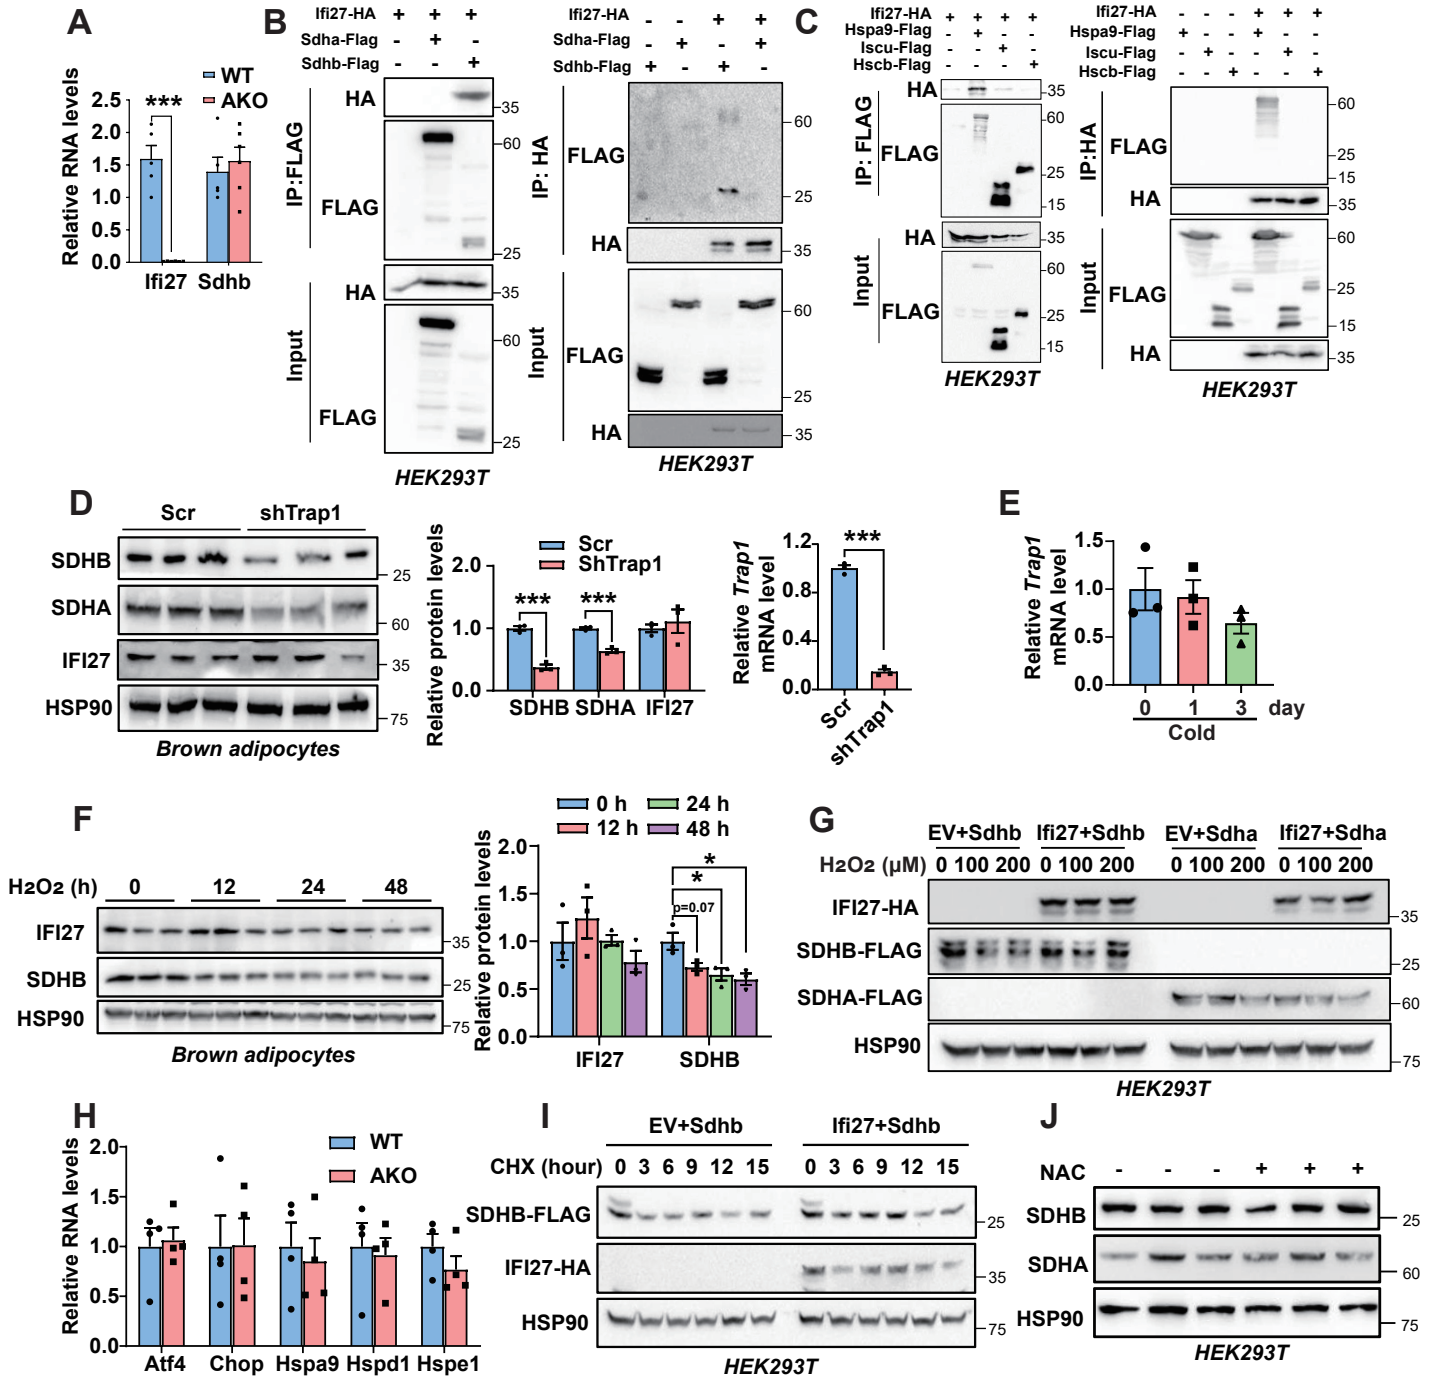

**Figure S5. IFI27 stabilizes SDHB in face of stress**

**A.** Relative mRNA levels of *Ifi27* and *Sdhb* in BAT of WT and AKO mice. The mice were exposed to 4°C for 6 h without food. n=5-6 each genotype.

**B,C.** Plasmids were transfected into HEK293T cells. The interaction between IFI27 and indicated proteins was analyzed by immunoprecipitation assay that was performed 48 h after transfection.

**D.** Western blot analysis (left) of indicated proteins and their quantification (middle) in immortalized brown adipocytes expressing lentiviral shRNAs targeting *Trap1*. Right panel: the relative mRNA level of *Trap1* in *Trap1*-knockdown mature brown adipocytes. n=3 each group.

**E.** Relative *Trap1* mRNA level in BAT of the mice which were exposed to cold for 0 to 3 days. n=3 each group.

**F.** Hydrogen peroxide (H<sub>2</sub>O<sub>2</sub> 100 μM) treated the brown adipocytes for indicated time before the western blot analysis.

**G.** The indicated plasmids were transfected into HEK293T cells. H<sub>2</sub>O<sub>2</sub> treated the cells for 12 h before the western blot analysis.

**H.** Relative mRNA levels of the indicated genes in BAT of WT and AKO mice. The mice were exposed to 4°C for 6h. n=4 each genotype.

**I.** SDHB and IFI27 were ectopically expressed in HEK293T cells by plasmid transfection. Cycloheximide (CHX) treated cells for indicated time followed by western blot analysis.

**J.** Brown preadipocytes were induced to differentiation by standard protocol with or without supplementing N-acetyl cysteine (NAC, 2mM). SDHA and SDHB protein levels were analyzed by western blot on day 6.

For statistical analyses, two-tailed unpaired Student's t test was performed in (A, D). One-way ANOVA analysis of variance and Tukey's post hoc tests were performed in (F), The data shown are mean ± SEM. \*p < 0.05; \*\*\*p < 0.001.

Fig. S6

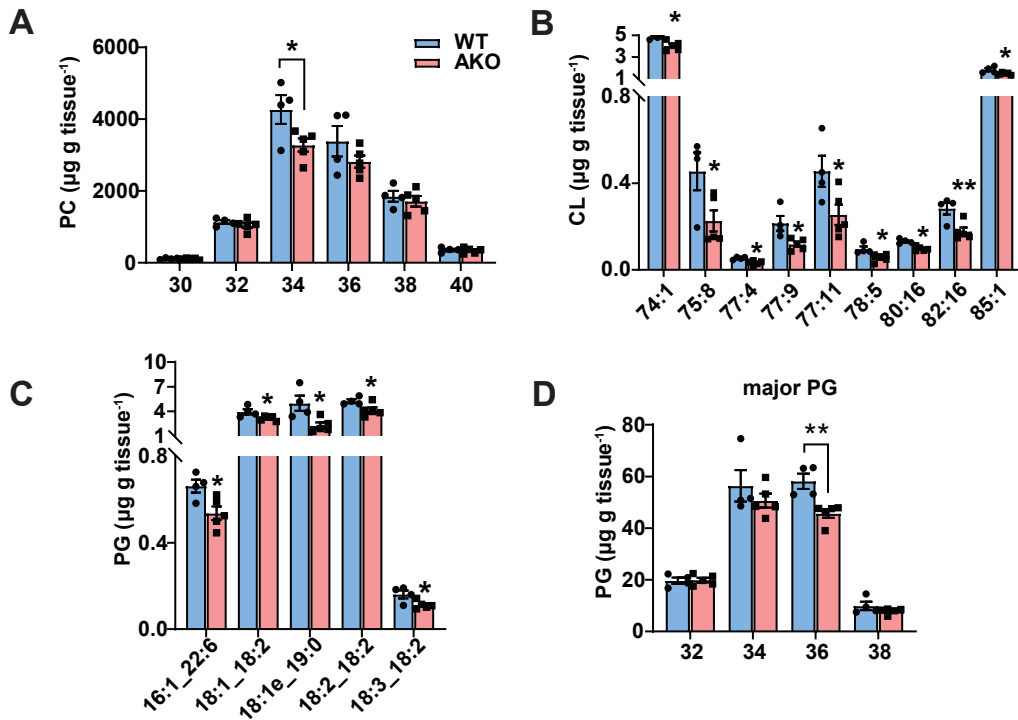

**Figure S6. IFI27 ablation changes the composition of lipid species in BAT**

**A.** The abundance of major PC species in BAT of WT (n=4) and AKO (n=5) mice.

**B.** The abundance of the indicated CL species in BAT of WT (n=4) and AKO (n=5) mice.

**C,D** The abundance of the indicated PG species in BAT of WT (n=4) and AKO (n=5) mice.

For statistical analyses, two-tailed unpaired Student's t test was performed. The data shown are mean  $\pm$  SEM. \*p < 0.05; \*\*p < 0.01.

Table S1. IFI27 interacting proteins identified by IP-MS

|    | <b>Accession</b> | <b>Gene Name</b> | <b>Coverage [%]</b> | <b># Peptides</b> | <b># PS Ms</b> | <b># Unique Peptides</b> | <b>Abundances (Grouped): IFI27-1</b> | <b>Abundances (Grouped): IFI27-2</b> | <b>Abundances (Grouped): Control</b> |
|----|------------------|------------------|---------------------|-------------------|----------------|--------------------------|--------------------------------------|--------------------------------------|--------------------------------------|
| 1  | P38647           | Hspa9            | 58                  | 38                | 187            | 38                       | 1037070233.9                         | 995372055.6                          | 756599431.7                          |
| 2  | Q8BMS1           | Hadha            | 56                  | 27                | 84             | 27                       | 250030303.2                          | 217566192.4                          | 164005674.6                          |
| 3  | P63038           | Hspd1            | 47                  | 20                | 48             | 20                       | 71872369.2                           | 78754832.1                           | 55709347.2                           |
| 4  | D3Z041           | Acs11            | 36                  | 20                | 42             | 20                       | 45068662.9                           | 47129897.9                           | 35098094.0                           |
| 5  | Q8BVI9           | Slc25a4          | 34                  | 8                 | 21             | 2                        | 2863431.2                            | 2656029.0                            | 1933125.2                            |
| 6  | E9Q1C5           | Ifi27            | 32                  | 5                 | 15             | 5                        | 373630645.3                          | 358777861.0                          | 2436438.5                            |
| 7  | P51175           | Ppox             | 24                  | 7                 | 10             | 7                        | 4888325.5                            | 11038065.6                           | 4055904.5                            |
| 8  | Q8BWM0           | Ptges2           | 23                  | 6                 | 11             | 6                        | 9898547.0                            | 8678278.2                            | 6712477.3                            |
| 9  | P18155           | Mthfd2           | 19                  | 5                 | 10             | 5                        | 59369880.3                           | 59155660.5                           | 47178235.5                           |
| 10 | G5E895           | Akr1b10          | 16                  | 5                 | 11             | 2                        | 22017551.0                           | 21201729.6                           | 13820776.3                           |
| 11 | O70325           | Gpx4             | 13                  | 2                 | 3              | 2                        | 4105422.6                            | 4143945.6                            | 2923584.4                            |
| 12 | B1AU25           | Aifm1            | 12                  | 5                 | 7              | 5                        | 4417812.4                            | 4453928.8                            | 2958593.6                            |
| 13 | Q9CQA3           | Sdhb             | 12                  | 3                 | 7              | 3                        | 4848256.3                            | 3993942.3                            | 3257724.9                            |
| 14 | Q80ZS3           | Mrps26           | 10                  | 2                 | 3              | 2                        | 726357.2                             | 661384.6                             | 484515.3                             |
| 15 | A0A0J9YV64       | Polg             | 10                  | 1                 | 1              | 1                        | 73902723.9                           | 62241656.0                           | 50059212.2                           |
| 16 | Q3ULD5           | Mccc2            | 7                   | 3                 | 5              | 3                        | 1245876.8                            | 1332441.3                            | 720431.1                             |
| 17 | G3X9M0           | Dap3             | 7                   | 2                 | 4              | 2                        | 1179790.7                            | 717457.4                             | 286735.8                             |
| 18 | Q78PY7           | Snd1             | 2                   | 2                 | 2              | 2                        | 888143.5                             | 758497.2                             | 567787.5                             |
| 19 | Q64521           | Gpd2             | 2                   | 2                 | 5              | 2                        | 1906992.7                            | 1694166.3                            | 1398418.1                            |
| 20 | Q3U2U4           | Mrps5            | 2                   | 1                 | 1              | 1                        | 974418.3                             | 725779.1                             | 566534.0                             |
| 21 | P54071           | Idh2             | 2                   | 1                 | 2              | 1                        | 438103.4                             | 473444.7                             | 358295.0                             |

Table S3 Antibodies used in this study

| <b>Company</b>            | <b>Antibody</b>         | <b>Product code</b> |
|---------------------------|-------------------------|---------------------|
| Abcam                     | anti-UCP1               | ab10983             |
| Cell Signaling Technology | anti-p-HSL(Ser660)      | #45804              |
| Proteintech               | anti-VDAC1              | 55259-1-AP          |
|                           | anti-HSP90              | 13171-1-AP          |
|                           | anti- $\alpha$ -TUBULIN | 66031-1-Ig          |
|                           | anti-OGDH               | 15212-1-AP          |
|                           | anti-CS                 | 16131-1-AP          |
|                           | anti-IDH3A              | 15909-1-AP          |
|                           | anti-NDUFA9             | 20312-1-AP          |
|                           | anti-SDHA               | 14865-1-AP          |
|                           | anti-SDHB               | 10620-1-AP          |
|                           | anti-UQCRC2             | 14742-1-AP          |
|                           | anti-COX7A1             | 11413-1-AP          |
|                           | anti-ATP5A              | 66037-1-Ig          |
|                           | anti-CHCHD10            | 25671-1-AP          |
|                           | anti-HK2                | 22029-1-AP          |
|                           | anti-PKM                | 15821-1-AP          |
|                           | anti-PFKL               | 15652-1-AP          |
|                           | anti-LDHA               | 19887-1-AP          |
|                           | anti-PDHA1              | 18068-1-AP          |
|                           | anti-HSL                | 17333-1-AP          |
|                           | anti-ATGL               | 55190-1-AP          |
|                           | anti-CPT1B              | 22170-1-AP          |
|                           | anti-HSPA9              | 14887-1-AP          |
|                           | anti-FLAG               | 20543-1-AP          |
|                           | anti-GST                | 10000-0-AP          |
|                           | anti-LONP1              | 15440-1-AP          |
|                           | anti-HADHA              | 10758-1-AP          |

Table S4. Small hairpin RNA targeting sequence used in this study

| <b>shRNA</b> | <b>target sequence</b> |
|--------------|------------------------|
| shIfi27-1    | CCTCTCTAGCAGCTAAGATGA  |
| shIfi27-2    | TCTAACACAGAGAAGGATTAA  |
| shSdhb       | CCCTGATTTGAGTAACTTCTA  |
| shLonp1      | CCTGAGAACCTACAAGACTTT  |
| shTrap1      | GCTGACAAGGTTGAAGTCTAT  |
